# Supplementary material for: The Robust Self-Assembling Tubular Nanostructures Formed by gp053 from Phage vB_EcoM_FV3
Source: PubMed Central journal article supplement (PMC6357053; doi:10.3390/v11010050), 2019-01-11
Supplement: viruses-11-00050-s001.pdf [file viruses-11-00050-s001.pdf]

## SUPPLEMENTARY MATERIAL

**Table S1.** Oligonucleotides used in this work. The restriction sites are underlined.

| Primer name   | Primer sequence                                      | Restriction enzyme  |
|---------------|------------------------------------------------------|---------------------|
| FV53_NdeI_F1  | GGAA <u>ACATATGCCATATTTAGATA</u> AAAGTG              | NdeI                |
| FV53_BamHI_R1 | TTGAG <u>GATCC</u> ATCTAGTCTTCCTTATTC                | BamHI               |
| FV53_XhoI_R1  | CATCTAGTCTTC <u>CTCGAGTTCAGTC</u> ATTG               | XhoI                |
| FV53_Nde10F   | TAAAGTGGT <u>ACATATGACAGT</u> TAAAC                  | NdeI                |
| FV53_Bam10R   | CAGCATTGGT <u>GGATCCTTAA</u> CCAAC                   | BamHI               |
| FV53_Xho10R   | CAGCATTGGTGG <u>ACTCGAGACCA</u> AC                   | XhoI                |
| FV53_Nde20F   | CCCAGCCTATT <u>CATATGGT</u> AGGTTC                   | NdeI                |
| FV53_Bam20RN  | GTCCAGA <u>AGGATCCTTTACCG</u> GATACG                 | BamHI               |
| FV53_Xho20R   | GAAGGACGTTGATCT <u>CGAGACGA</u> AC                   | XhoI                |
| FV53_Nde25F   | CTGTAGGTTTC <u>CATATGCCG</u> CTG)                    | NdeI                |
| FV53_Bam25R   | GTTGATCC <u>GGATCCGA</u> ACTTAGTGC                   | BamHI               |
| FV53_Xho25R   | GATCCGATACGCT <u>CGAGGTGC</u> AG                     | XhoI                |
| FV53_Nde30F   | GAAACTCCGCTG <u>CATATGG</u> CTATCC                   | NdeI                |
| FV53_Bam30R   | CGAAGTGCG <u>GATCCTTGTTT</u> TACAC                   | BamHI               |
| FV53_Xho30R   | GAAGTGCAGGGCGT <u>CTCGAGAC</u> ACCAG                 | XhoI                |
| FV3_Bam50R    | CTGATT <u>GGATCC</u> GATCTATGCACG                    | BamHI               |
| FV3_Bam75R    | CTGTCAGGATCCCTCAATTCTTAATG                           | BamHI               |
| FV3_Bam100R   | CGGAAGATCAGGATCCGACTACTTCATG                         | BamHI               |
| FV3_Bam150R   | CAACACCGTGGATCCTTCAGTAGAAG                           | BamHI               |
| FV3_Bam200R   | CACCTATGATAGGATCCTACGGAAAATC                         | BamHI               |
| FV3_m_N_C_F   | GATATACATATGGCTAGCACAGGTACCCCA<br>TATTTAGATAAAAGTGG  | NdeI, NheI, Acc65I  |
| FV3_m_N_C_R   | GTGGTGCTCGAGTTACGTACGTGTACTAGTT<br>TCAGTCATTGCAACAGC | XhoI, Pfl23II, BcuI |

**Table S2.** Constructs of gp053.

| Mutant              | Primers used for PCR fragment amplification | Expression vector | Amino acid residues, MW (kDa) | Description of self-assembling structures                      |
|---------------------|---------------------------------------------|-------------------|-------------------------------|----------------------------------------------------------------|
| Full-length gp053   | FV53_NdeI_F1<br>FV53_BamHI_R1               | pET-21a           | 458 (50.2)                    | Regular polysheaths, length up to ~1000 nm, width 27,8±2,7 nm. |
| gp053_N-his         | FV53_NdeI_F1<br>FV53_BamHI_R1               | pET-16b           | 479 (52.8)                    | Regular polysheaths, length up to ~300 nm, width ~28 nm.       |
| gp053_C-his         | FV53_NdeI_F1<br>FV53_XhoI_R1                | pET-21a           | 466 (51.3)                    | Regular polysheaths, length up to ~1000 nm, width ~28 nm.      |
| gp053_NΔ9           | FV53_Nde10F<br>FV53_BamHI_R1                | pET-21a           | 449 (49.2)                    | Regular polysheaths, length up to ~600 nm, width ~28 nm.       |
| gp053_CΔ11          | FV53_NdeI_F1<br>FV53_Bam10R                 | pET-21a           | 447 (49.1)                    | Regular polysheaths, length up to ~600 nm, width ~28 nm.       |
| gp053_NΔ9_CΔ11      | FV53_Nde10F<br>FV53_Bam10R                  | pET-21a           | 438 (48.1)                    | Regular polysheaths, length up to ~500 nm, width ~28 nm.       |
| gp053_NΔ9-his_CΔ11  | FV53_Nde10F<br>FV53_Bam10R                  | pET-16b           | 459 (50.6)                    | Regular polysheaths, length up to ~800 nm, width ~28 nm.       |
| gp053_NΔ9_CΔ11-his  | FV53_Nde10F<br>FV53_Xho10R                  | pET-21a           | 446 (49.2)                    | Regular polysheaths, length up to ~800 nm, width ~28 nm.       |
| gp053_NΔ20          | FV53_Nde20F<br>FV53_BamHI_R1                | pET-21a           | 438 (48.1)                    | Regular polysheaths, length up to ~500 nm, width ~28 nm.       |
| gp053_NΔ20_CΔ20     | FV53_Nde20F<br>FV53_Bam20RN                 | pET-21a           | 418 (46.0)                    | Regular polysheaths, length up to ~600 nm, width ~28 nm.       |
| gp053_NΔ20-his_CΔ20 | FV53_Nde20F<br>FV53_Bam20RN                 | pET-16b           | 439 (48.5)                    | Regular polysheaths, length up to ~1000 nm, width ~28 nm.      |
| gp053_NΔ20_CΔ20-his | FV53_Nde20F<br>FV53_Xho20R                  | pET-21a           | 424 (46.8)                    | Regular polysheaths, length up to ~1000 nm, width ~28 nm.      |
| gp053_NΔ25_CΔ25     | FV53_Nde25F<br>FV53_Bam25R                  | pET-21a           | 408 (44.8)                    | Regular polysheaths, length up to ~800 nm, width ~28 nm.       |
| gp053_NΔ25-his_CΔ25 | FV53_Nde25F                                 | pET-16b           | 429 (47.3)                    | Regular polysheaths, length up to ~800 nm, width ~28 nm.       |

|                     |                              |         |                  |                                                                                                   |
|---------------------|------------------------------|---------|------------------|---------------------------------------------------------------------------------------------------|
|                     | FV53_Bam25RN                 |         |                  | nm), width ~28 nm.                                                                                |
| gp053_NΔ25_CΔ25-his | FV53_Nde25F<br>FV53_Xho25R   | pET-21a | 416 (45.9)       | Regular polysheaths, length up to ~800 nm, width ~28 nm.                                          |
| gp053_NΔ29          | FV53_Nde30F<br>FV53_BamHI_R1 | pET-21a | 429 (47.1)       | Soluble unordered protein ribbons                                                                 |
| gp053_NΔ29_CΔ31     | FV53_Nde30F<br>FV53_Bam30R   | pET-21a | 398 (43.6)       | Soluble unordered protein ribbons                                                                 |
| gp053_NΔ29-his_CΔ31 | FV53_Nde30F<br>FV53_Bam30R   | pET-16b | 419 (46.1)       | Insoluble protein                                                                                 |
| gp053_CΔ31          | FV53_NdeI_F1<br>FV53_Bam30R  | pET-21a | 427 (46.8)       | Regular polysheaths, length up to ~600 nm, width ~28 nm.                                          |
| gp053_CΔ51          | FV53_NdeI_F1<br>FV53_Bam50R  | pET-21a | 407 (44.6)       | Regular polysheaths, length up to ~600 nm, width ~28 nm.                                          |
| gp053_CΔ76          | FV53_NdeI_F1<br>FV53_Bam75R  | pET-21a | 382 (41.9)       | Regular polysheaths, length up to ~600 nm, width ~28 nm.                                          |
| gp053_CΔ100         | FV53_NdeI_F1<br>FV53_Bam100R | pET-21a | 358 (39.3)       | Regular polysheaths, length up to ~3000 nm, width ~32 nm.                                         |
| gp053_CΔ152         | FV53_NdeI_F1<br>FV53_Bam150R | pET-21a | 306 (33.2)       | Soluble unordered protein ribbons                                                                 |
| gp053_CΔ200         | FV53_NdeI_F1<br>FV53_Bam200R | pET-21a | 258 (28.0)       | Soluble unordered protein ribbons                                                                 |
| gp053_C-strep       | FV53_NdeI_F1<br>Pfl23Strep   | pET21a  | 468<br>(51.54)   | Regular polysheaths, length up to ~500 nm, width ~28 nm.                                          |
| gp053_NΔ25_C-strep  | FV53_Nde25F<br>Pfl23Strep    | pET21a  | 443<br>(48.84)   | Insoluble protein                                                                                 |
| gp053_N_C_mon       | FV3_m_N_C_F<br>FV3_m_N_C_R   | pET21a  | 468<br>(51.21)   | Regular polysheaths, length up to ~500 nm, width ~28 nm.                                          |
| gp053_N_C_dim       | FV3_m_N_C_F<br>FV3_m_N_C_R   | pET21a  | 930<br>(101.75)  | Irregular polysheaths, length up to ~200 nm after 48 hours of incubation <i>in vitro</i> at 22°C. |
| gp053_N_C_trim      | FV3_m_N_C_F<br>FV3_m_N_C_R   | pET21a  | 1392<br>(152.29) | Irregular polysheaths, length up to ~200 nm after 48 hours of incubation <i>in vitro</i> at 22°C. |

|                |                            |        |                  |                                                                                                   |
|----------------|----------------------------|--------|------------------|---------------------------------------------------------------------------------------------------|
| gp053_N_C_tetr | FV3_m_N_C_F<br>FV3_m_N_C_R | pET21a | 1854<br>(202.83) | Irregular polysheaths, length up to ~150 nm after 48 hours of incubation <i>in vitro</i> at 22°C. |
| gp053_N_C_pent | FV3_m_N_C_F<br>FV3_m_N_C_R | pET21a | 2316<br>(253.38) | Irregular polysheaths, length up to ~200 nm after 48 hours of incubation <i>in vitro</i> at 22°C. |
| gp053_N_C_hex  | FV3_m_N_C_F<br>FV3_m_N_C_R | pET21a | 2778<br>(303.92) | Irregular polysheaths, length up to ~150 nm after 48 hours of incubation <i>in vitro</i> at 22°C. |

**Supplementary Table S3.** Homology of gp053 from FV3 with proteins from other bacteriophages.

| Significant match<br>protein accession number, organism (taxonomic lineage)                                   | Identity aa %/<br>similarity aa%<br>(length of the<br>overlapping<br>segment) | E value |
|---------------------------------------------------------------------------------------------------------------|-------------------------------------------------------------------------------|---------|
| <a href="#">AKO61920.1</a> , <i>Escherichia</i> phage APCEc02 ( <i>Vequintavirinae</i> , V5virus)             | 99/99 (458)                                                                   | 0.0     |
| <a href="#">ATW61401.1</a> , phage 203 ( <i>Vequintavirinae</i> , V5virus)                                    | 99/99 (458)                                                                   | 0.0     |
| <a href="#">YP_002003555.1</a> , <i>Escherichia</i> phage V5 ( <i>Vequintavirinae</i> , V5virus)              | 99/99 (458)                                                                   | 0.0     |
| <a href="#">YP_009177499.1</a> , <i>Escherichia</i> phage vB_EcoM_FFH2 ( <i>Vequintavirinae</i> , V5virus)    | 99/99 (458)                                                                   | 0.0     |
| <a href="#">YP_008530297.1</a> , <i>Escherichia</i> phage JES2013 ( <i>Vequintavirinae</i> , V5virus)         | 99/99 (458)                                                                   | 0.0     |
| <a href="#">ASJ80411.1</a> , <i>Escherichia</i> phage V18 ( <i>Vequintavirinae</i> , V5virus)                 | 98/99 (458)                                                                   | 0.0     |
| <a href="#">AKU44144.1</a> , <i>Escherichia</i> phage Murica ( <i>Vequintavirinae</i> , V5virus)              | 98/99 (458)                                                                   | 0.0     |
| <a href="#">AKE47028.1</a> , <i>Escherichia coli</i> O157 typing phage 14 ( <i>Vequintavirinae</i> , V5virus) | 98/98 (458)                                                                   | 0.0     |
| <a href="#">AVJ51863.1</a> , <i>Escherichia</i> phage PDX ( <i>Vequintavirinae</i> , V5virus)                 | 96/98 (458)                                                                   | 0.0     |
| <a href="#">AXU22620.1</a> , <i>Escherichia</i> phage vB_EcoM-Pr121LW ( <i>Vequintavirinae</i> , V5virus)     | 96/98 (458)                                                                   | 0.0     |
| <a href="#">AXC42731.1</a> , <i>Escherichia</i> phage LL12 ( <i>Vequintavirinae</i> , V5virus)                | 96/98 (458)                                                                   | 0.0     |
| <a href="#">YP_006987047.1</a> , <i>Cronobacter</i> phage vB_CsaM_GAP31 ( <i>Vequintavirinae</i> , Se1virus)  | 60/71 (468)                                                                   | 0.0     |

|                                                                                                           |             |        |
|-----------------------------------------------------------------------------------------------------------|-------------|--------|
| <a href="#">YP_009111160.1</a> , <i>Escherichia</i> phage Av-05 (unclassified myovirus)                   | 59/72 (468) | 0.0    |
| <a href="#">YP_004893867.1</a> , <i>Salmonella</i> phage PVP-SE1 ( <i>Vequintavirinae</i> , Se1virus)     | 59/73 (469) | 0.0    |
| <a href="#">YP_008857275.1</a> , Enterobacteria phage 4MG ( <i>Vequintavirinae</i> , Se1virus)            | 59/71 (469) | 0.0    |
| <a href="#">ARB12543.1</a> , <i>Klebsiella</i> phage vB_KpnP_BIS47 (unclassified bacterial virus)         | 59/71 (469) | 0.0    |
| <a href="#">YP_009187676.1</a> , <i>Klebsiella</i> phage vB_KpnM_KB57 (unclassified myovirus)             | 57/68 (493) | 0.0    |
| <a href="#">AXN57735.1</a> , <i>Acinetobacter</i> phage ABPH49 (unclassified myovirus)                    | 57/69 (468) | 8e-174 |
| <a href="#">ARB11491.1</a> , <i>Pectobacterium</i> phage vB_PatM_CB7 ( <i>Vequintavirinae</i> , Cr3virus) | 53/66 (464) | 4e-159 |
| <a href="#">YP_006383031.1</a> , <i>Cronobacter</i> phage CR3 ( <i>Vequintavirinae</i> , Cr3virus)        | 53/66 (464) | 7e-158 |
| <a href="#">YP_009042253.1</a> , <i>Cronobacter</i> phage CR8 ( <i>Vequintavirinae</i> , Cr3virus)        | 53/66 (464) | 1e-157 |
| <a href="#">YP_009014977.1</a> , <i>Cronobacter</i> phage CR9 ( <i>Vequintavirinae</i> , Cr3virus)        | 53/66 (462) | 1e-157 |
| <a href="#">ATS93415.1</a> , <i>Pectobacterium</i> phage DU_PP_I ( <i>Vequintavirinae</i> , Cr3virus)     | 53/65 (464) | 2e-157 |
| <a href="#">YP_007392684.1</a> , <i>Pectobacterium</i> phage phiTE ( <i>Vequintavirinae</i> , Cr3virus)   | 52/66 (462) | 3e-155 |

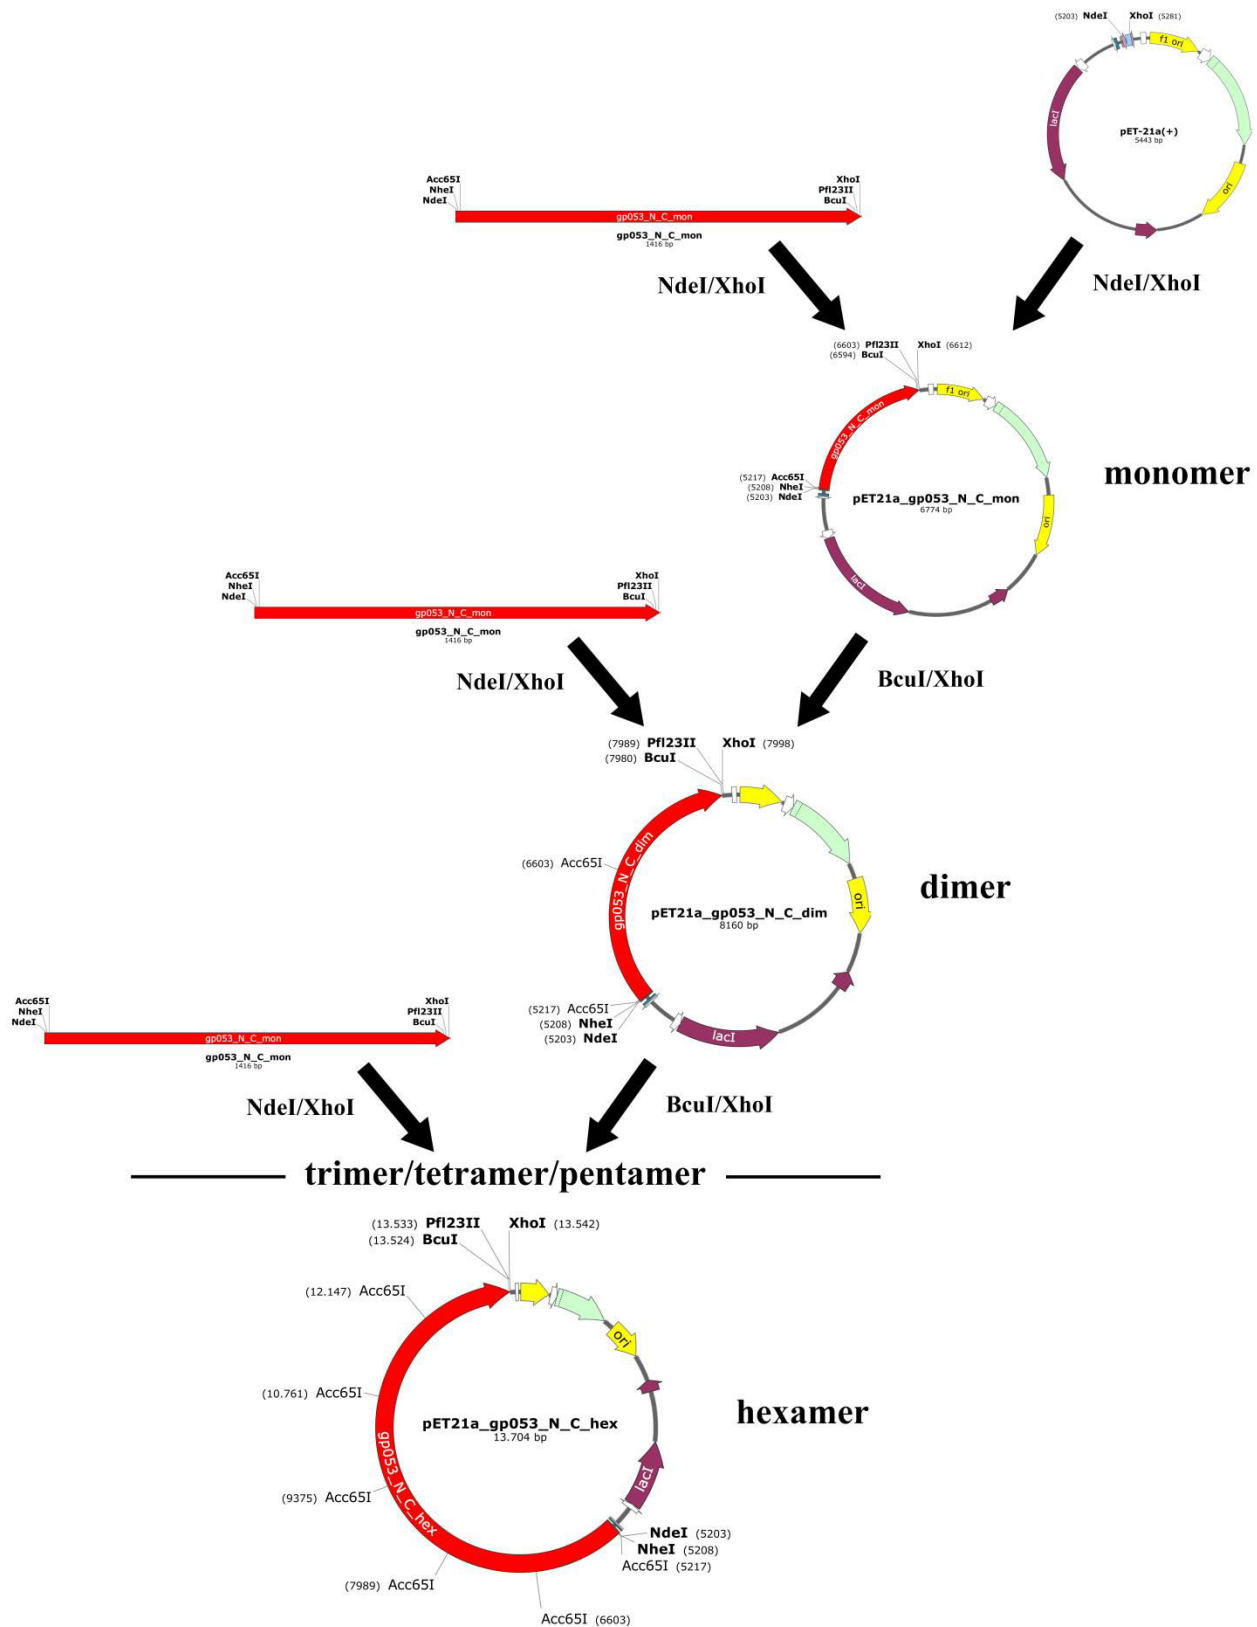

**Supplementary Figure S1.** Schematic representation of construction of gp053 oligomers. The PCR fragment of gene *053* mutant gp053\_N\_C\_mon was obtained by amplification of phage DNA using FV3\_m\_N\_C\_F and FV3\_m\_N\_C\_R primers presented in Supplementary Table S1. Restriction endonucleases, which were used to obtain restricted fragments and cloning vectors, are shown beside the arrows.

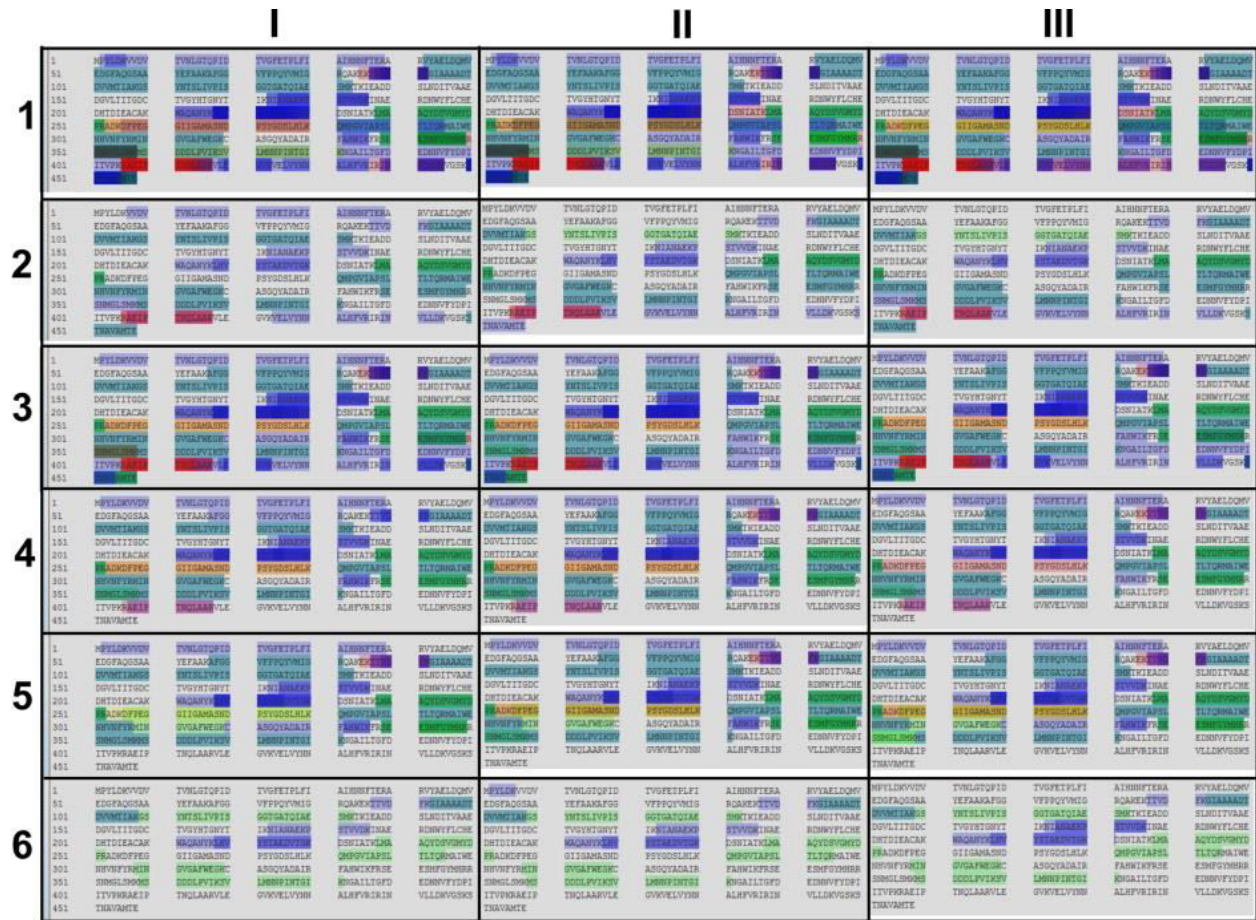

**Supplementary Figure S2.** The protein sequence coverage map obtained from the PLGS-processed MS<sup>E</sup> data. Rows (1-6) indicate the number of protein band, excised from the gel, columns (I-III) indicate three technical replicates of LC-MS/MS. Regions of the protein sequence that match peptides are highlighted in color: blue– matches to a peptide, red– matches to a partial peptide, green– matches to a modified peptide, yellow– matches to a partial modified peptide.
